# Supplementary material
Source: Springer Nature journal article supplement (https://www.springerprofessional.de/resource/supplementary/40192_2012_2_MOESM10_ESM.pdf/11899466)
Supplement: MOESM10 [file 11899466]

|                                                   |                                                        |                                                                                                                                                             |                                                                                                                       |                                                                                             |                                                                                |
|---------------------------------------------------|--------------------------------------------------------|-------------------------------------------------------------------------------------------------------------------------------------------------------------|-----------------------------------------------------------------------------------------------------------------------|---------------------------------------------------------------------------------------------|--------------------------------------------------------------------------------|
| <b>Process Step</b>                               | <b>Starting Billet Stock</b>                           | <b>Forging and Heat Treatment</b>                                                                                                                           | <b>Machining and Finishing</b>                                                                                        | <b>Assembly</b>                                                                             | <b>Service</b>                                                                 |
| <b>ICME Focus Areas</b>                           | Description of starting composition and microstructure | Microstructure-property evolution and <b>residual stress field</b>                                                                                          | <b>Residual stress field</b> evolution and part distortion                                                            | <b>Final residual stress field</b> in part after assembly                                   | Integration of residual stress field with service stress for life prediction   |
| <b>Critical Elements</b><br>(for the ICME effort) |                                                        | <ul style="list-style-type: none"> <li>• Temperatures <b>1</b></li> <li>• Time transients</li> <li>• Microstructure evolution <b>3</b></li> </ul>           | Part geometry and removal sequence <b>4</b>                                                                           | Assembly tolerances <b>4</b>                                                                | High fidelity and confidence in residual stress field predictions <b>5</b>     |
| <b>Critical Validation Elements</b>               |                                                        | <ul style="list-style-type: none"> <li>• Temperatures and transients</li> <li>• Heat transfer coefficients <b>2</b></li> <li>• Measured RS field</li> </ul> | <ul style="list-style-type: none"> <li>• Dimensional changes</li> <li>• RS field in finished part <b>2</b></li> </ul> | <ul style="list-style-type: none"> <li>• Dimensional tolerances for assembly fit</li> </ul> | <ul style="list-style-type: none"> <li>• Life prediction validation</li> </ul> |
